# Supplementary material for: Analysis of respiratory and systemic immune responses in COVID-19 reveals mechanisms of disease pathogenesis
Source: bioRxiv or medRxiv preprint supplement (doi:10.1101/2020.10.15.20208041), 2020-10-18

A

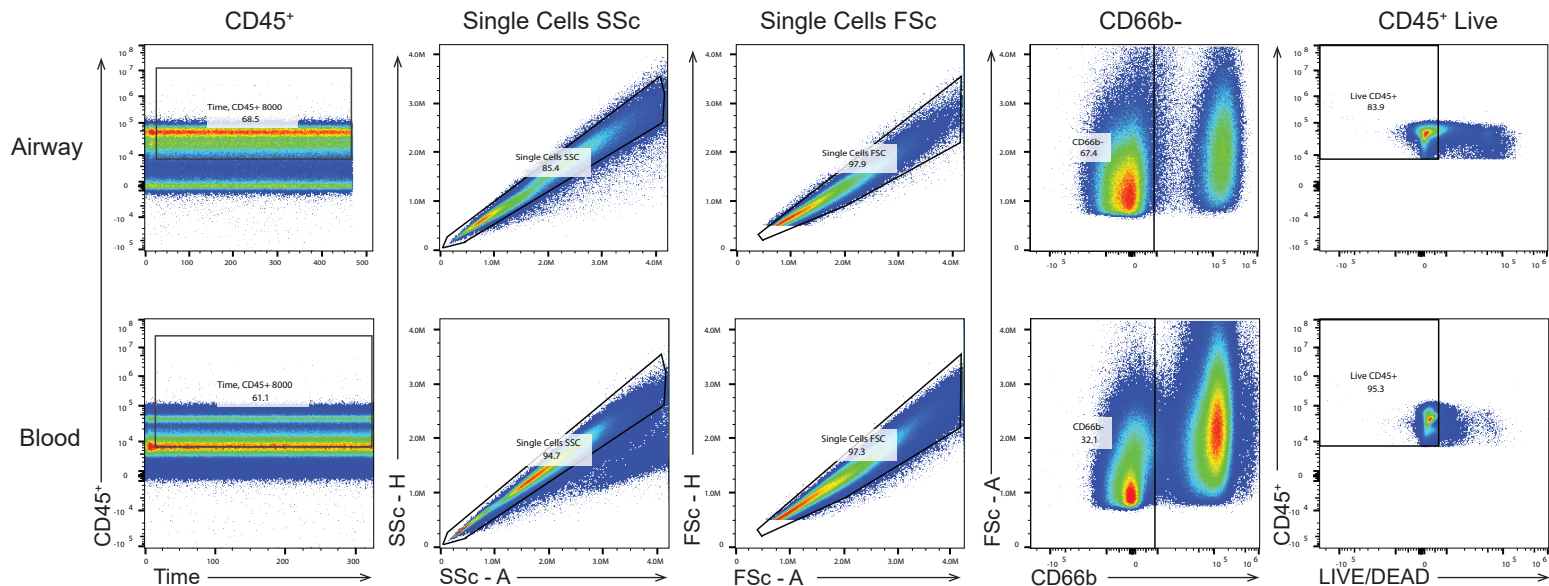

Supplement: Supplementary file [file media-1.pdf]
